# Supplementary material
Source: publisher figshare collection journal article supplement (https://brill.figshare.com/articles/dataset/_/26304979)
Supplement: Supplementary file 1 [file 1]

## Sheet: Sheet1
Date (mm/dd/yyyy)	Species	Season / period	Diel light cateogry	Time	Temp. °C	% Moon illuminance	Min. N indiv. (inf.)*
2017-07-30	Crocuta crocuta	Wet	Dawn	06:29:33	23	1	1
2017-11-17	Crocuta crocuta	Early Dry	Dawn	06:48:16	20	1.6	1
2015-07-18	Crocuta crocuta	Wet	Day	06:59:55	24	na	1
2017-09-26	Crocuta crocuta	Wet	Day	07:16:15	27	na	1
2017-10-13	Crocuta crocuta	Wet	Day	18:26:02	31	na	1
2017-11-17	Crocuta crocuta	Early Dry	Day	08:05:59	20	na	2
2017-08-20	Crocuta crocuta	Wet	Dusk	19:11:25	26	1	1
2015-07-20	Crocuta crocuta	Wet	Night	19:59:37	28	20.5	1
2016-02-13	Crocuta crocuta	Early Dry	Night	03:13:13	16	1	2
2017-10-10	Crocuta crocuta	Wet	Night	05:02:07	25	75.5	1
2017-11-17	Crocuta crocuta	Early Dry	Night	18:46:32	26	1	1
2018-04-11	Crocuta crocuta	Late Dry	Night	23:18:30	27	1	1
2018-04-26	Crocuta crocuta	Late Dry	Night	03:06:09	26	83.2	1
2017-09-18	Lycaon pictus	Wet	Day	08:43:54	25	na	3
2016-03-21	Pan troglodytes	Late Dry	Dawn	06:40:36	24	1	1
2016-05-01	Pan troglodytes	Late Dry	Dawn	06:09:24	28	38.1	1
2017-08-29	Pan troglodytes	Wet	Dawn	06:38:19	27	1	2
2017-10-10	Pan troglodytes	Wet	Dawn	06:28:30	27	74.9	1
2018-04-08	Pan troglodytes	Late Dry	Dawn	06:42:17	25	50.4	1
2016-01-12	Pan troglodytes	Early Dry	Day	13:26:04	28	na	2(1)
2016-01-23	Pan troglodytes	Early Dry	Day	11:12:15	30	na	4
2016-01-25	Pan troglodytes	Early Dry	Day	11:13:05	31	na	5(2)
2016-02-04	Pan troglodytes	Early Dry	Day	10:59:02	29	na	7(1)
2016-02-05	Pan troglodytes	Early Dry	Day	16:22:41	39	na	3(1)
2016-02-08	Pan troglodytes	Early Dry	Day	15:45:52	39	na	4(1)
2016-02-10	Pan troglodytes	Early Dry	Day	16:45:02	35	na	5(1)
2016-02-13	Pan troglodytes	Early Dry	Day	15:17:06	39	na	1
2016-02-15	Pan troglodytes	Early Dry	Day	09:29:18	16	na	1
2016-02-19	Pan troglodytes	Early Dry	Day	14:43:21	34	na	5
2016-03-02	Pan troglodytes	Late Dry	Day	15:18:01	41	na	4(1)
2016-03-11	Pan troglodytes	Late Dry	Day	15:26:59	33	na	1
2016-03-23	Pan troglodytes	Late Dry	Day	15:50:08	46	na	2(1)
2016-03-23	Pan troglodytes	Late Dry	Day	16:34:37	46	na	4(2)
2016-04-09	Pan troglodytes	Late Dry	Day	17:33:04	46	na	2(1)
2016-04-25	Pan troglodytes	Late Dry	Day	14:42:56	40	na	2(1)
2016-04-26	Pan troglodytes	Late Dry	Day	16:13:59	43	na	6(2)
2016-05-02	Pan troglodytes	Late Dry	Day	06:49:33	26	na	1
2016-05-06	Pan troglodytes	Late Dry	Day	06:30:24	27	na	3(1)
2016-05-11	Pan troglodytes	Late Dry	Day	14:32:30	39	na	2
2016-05-12	Pan troglodytes	Late Dry	Day	08:51:45	28	na	5
2016-05-13	Pan troglodytes	Late Dry	Day	10:45:42	32	na	1
2016-05-13	Pan troglodytes	Late Dry	Day	11:28:21	33	na	3
2017-06-04	Pan troglodytes	Wet	Day	17:32:14	40	na	1
2017-06-06	Pan troglodytes	Wet	Day	16:06:19	40	na	1
2017-06-06	Pan troglodytes	Wet	Day	17:49:12	39	na	1
2017-07-05	Pan troglodytes	Wet	Day	09:48:58	29	na	5
2017-07-05	Pan troglodytes	Wet	Day	10:30:02	30	na	4
2017-07-05	Pan troglodytes	Wet	Day	10:51:05	31	na	4
2017-07-05	Pan troglodytes	Wet	Day	11:11:22	31	na	4
2017-07-05	Pan troglodytes	Wet	Day	11:31:26	32	na	5
2017-07-31	Pan troglodytes	Wet	Day	16:54:10	30	na	2(1)
2017-08-17	Pan troglodytes	Wet	Day	18:10:49	31	na	5(1)
2017-08-17	Pan troglodytes	Wet	Day	18:27:39	31	na	2
2017-08-28	Pan troglodytes	Wet	Day	07:17:28	26	na	4(1)
2017-08-28	Pan troglodytes	Wet	Day	07:48:25	26	na	3(1)
2017-08-28	Pan troglodytes	Wet	Day	12:36:48	30	na	2
2017-09-02	Pan troglodytes	Wet	Day	08:05:50	28	na	4(1)
2017-09-03	Pan troglodytes	Wet	Day	18:26:02	30	na	4(1)
2017-09-03	Pan troglodytes	Wet	Day	18:49:56	30	na	1
2017-09-04	Pan troglodytes	Wet	Day	13:48:19	29	na	2
2017-09-06	Pan troglodytes	Wet	Day	17:18:09	29	na	1
2017-09-07	Pan troglodytes	Wet	Day	06:59:21	26	na	10(3)
2017-10-01	Pan troglodytes	Wet	Day	16:49:11	34	na	3(1)
2017-10-19	Pan troglodytes	Wet	Day	16:01:31	31	na	2
2017-10-19	Pan troglodytes	Wet	Day	16:31:46	30	na	4
2017-10-23	Pan troglodytes	Wet	Day	17:45:24	29	na	4
2017-10-24	Pan troglodytes	Wet	Day	15:42:24	30	na	3(1)
2017-10-27	Pan troglodytes	Wet	Day	13:34:36	31	na	4(1)
2017-10-27	Pan troglodytes	Wet	Day	14:59:44	31	na	3
2017-10-27	Pan troglodytes	Wet	Day	19:42:16	31	na	1
2017-10-28	Pan troglodytes	Wet	Day	07:27:51	23	na	4(1)
2017-10-28	Pan troglodytes	Wet	Day	07:49:19	23	na	3(1)
2017-10-29	Pan troglodytes	Wet	Day	08:43:27	24	na	4(1)
2017-10-29	Pan troglodytes	Wet	Day	17:07:26	32	na	3
2017-10-29	Pan troglodytes	Wet	Day	18:14:22	31	na	1
2017-10-30	Pan troglodytes	Wet	Day	17:26:51	28	na	2(1)
2017-10-31	Pan troglodytes	Wet	Day	08:34:55	23	na	3(1)
2017-10-31	Pan troglodytes	Wet	Day	12:45:17	30	na	3
2017-11-01	Pan troglodytes	Early Dry	Day	09:00:41	24	na	1
2017-11-01	Pan troglodytes	Early Dry	Day	09:54:58	26	na	4
2017-11-01	Pan troglodytes	Early Dry	Day	12:40:24	31	na	3
2017-11-01	Pan troglodytes	Early Dry	Day	17:27:01	29	na	3
2017-11-02	Pan troglodytes	Early Dry	Day	18:03:12	32	na	4(1)
2017-11-03	Pan troglodytes	Early Dry	Day	18:19:21	31	na	3(1)
2017-11-04	Pan troglodytes	Early Dry	Day	08:24:47	23	na	3
2017-11-04	Pan troglodytes	Early Dry	Day	15:26:18	31	na	3
2017-11-05	Pan troglodytes	Early Dry	Day	09:42:23	26	na	6(1)
2017-11-08	Pan troglodytes	Early Dry	Day	07:03:54	20	na	1
2017-11-08	Pan troglodytes	Early Dry	Day	13:17:59	32	na	2(1)
2017-11-08	Pan troglodytes	Early Dry	Day	14:45:40	31	na	3(1)
2017-11-08	Pan troglodytes	Early Dry	Day	15:12:02	31	na	1
2017-11-08	Pan troglodytes	Early Dry	Day	16:41:15	33	na	5
2017-11-14	Pan troglodytes	Early Dry	Day	15:45:32	31	na	2(1)
2017-11-15	Pan troglodytes	Early Dry	Day	15:11:29	31	na	2(1)
2017-11-16	Pan troglodytes	Early Dry	Day	13:21:36	29	na	2
2017-11-16	Pan troglodytes	Early Dry	Day	13:41:54	30	na	1
2017-11-16	Pan troglodytes	Early Dry	Day	14:01:38	30	na	4(1)
2017-11-16	Pan troglodytes	Early Dry	Day	14:49:07	31	na	1
2017-11-16	Pan troglodytes	Early Dry	Day	15:10:43	31	na	6
2017-11-16	Pan troglodytes	Early Dry	Day	15:25:55	32	na	2
2018-01-30	Pan troglodytes	Early Dry	Day	13:34:07	35	na	3(1)
2018-01-31	Pan troglodytes	Early Dry	Day	13:29:14	37	na	1
2018-01-31	Pan troglodytes	Early Dry	Day	13:49:39	38	na	4
2018-02-21	Pan troglodytes	Early Dry	Day	09:43:28	29	na	2
2018-02-21	Pan troglodytes	Early Dry	Day	11:55:33	38	na	11(1)
2018-02-22	Pan troglodytes	Early Dry	Day	15:58:25	35	na	1
2018-03-08	Pan troglodytes	Late Dry	Day	09:53:08	25	na	1
2018-03-31	Pan troglodytes	Late Dry	Day	13:08:09	36	na	1
2018-04-06	Pan troglodytes	Late Dry	Day	06:57:55	24	na	3(1)
2018-04-06	Pan troglodytes	Late Dry	Day	07:13:59	24	na	1
2018-04-10	Pan troglodytes	Late Dry	Day	10:02:09	28	na	1
2018-04-12	Pan troglodytes	Late Dry	Day	09:10:44	25	na	1
2018-04-18	Pan troglodytes	Late Dry	Day	10:07:14	40	na	1
2018-05-07	Pan troglodytes	Late Dry	Day	11:20:01	41	na	1
2018-05-11	Pan troglodytes	Late Dry	Day	17:35:50	35	na	3
2017-09-03	Pan troglodytes	Wet	Dusk	19:08:04	30	93.5	2
2017-10-09	Pan troglodytes	Wet	Dusk	18:54:05	31	1	2
2016-02-20	Pan troglodytes	Early Dry	Night	00:26:05	25	92.4	5(2)
2016-03-20	Pan troglodytes	Late Dry	Night	19:53:04	31	93.5	1
2017-09-04	Pan troglodytes	Wet	Night	05:54:45	26	1	1
2017-10-10	Pan troglodytes	Wet	Night	06:07:21	27	75	2
2017-10-28	Pan troglodytes	Wet	Night	06:12:06	25	1	3(1)
2017-11-08	Pan troglodytes	Early Dry	Night	19:15:23	29	1	2
2017-11-09	Pan troglodytes	Early Dry	Night	04:54:35	24	68.4	1
2016-01-20	Panthera pardus	Early Dry	Day	17:33:32	25	na	1
2017-10-19	Panthera pardus	Wet	Day	11:16:08	27	na	1
2017-10-25	Panthera pardus	Wet	Day	11:37:28	30	na	1
2018-02-14	Panthera pardus	Early Dry	Day	08:56:40	27	na	1
2015-07-14	Panthera pardus	Wet	Dusk	19:33:46	30	1	1
2015-07-11	Panthera pardus	Wet	Night	20:06:17	25	1	1
2016-01-29	Panthera pardus	Early Dry	Night	05:53:49	17	76.1	1
2016-02-10	Panthera pardus	Early Dry	Night	21:33:46	20	1	1
2016-02-15	Panthera pardus	Early Dry	Night	01:01:00	22	1	1
2016-02-18	Panthera pardus	Early Dry	Night	04:38:38	23	1	1
2016-02-19	Panthera pardus	Early Dry	Night	23:40:21	26	92.2	1
2017-07-06	Panthera pardus	Wet	Night	00:43:50	27	91.1	1
2017-09-30	Panthera pardus	Wet	Night	05:27:59	27	1	1
2017-11-14	Panthera pardus	Early Dry	Night	19:09:31	26	1	1
2018-02-03	Panthera pardus	Early Dry	Night	00:34:46	26	91.7	1
2018-02-10	Panthera pardus	Early Dry	Night	00:03:10	26	1	1
2018-02-13	Panthera pardus	Early Dry	Night	00:13:56	28	1	1
2018-03-02	Panthera pardus	Late Dry	Night	20:13:44	35	99.1	1
2018-03-21	Panthera pardus	Late Dry	Night	06:13:34	25	1	1
2018-03-25	Panthera pardus	Late Dry	Night	03:07:51	30	1	1
* Minimum number of individuals seen within the camera trap's field of view. The number of Infants clinging to their mothers are reported in parentheses.
