# Supplementary material
Source: publisher figshare collection journal article supplement (https://brill.figshare.com/articles/dataset/_/26304979)
Supplement: Supplementary file 1 [file 1]

**A survey of nocturnality and risk for savanna chimpanzees at Assirik, Senegal**

Stacy Lindshield<sup>a,\*</sup>, Papa Ibnou Ndiaye<sup>b</sup>, Addie Walters<sup>a</sup> and Stephanie L. Bogart<sup>c</sup>

<sup>a</sup>Department of Anthropology, Purdue University, West Lafayette, IN 47907, USA

<sup>b</sup>Département de Biologie animal, Faculté des Sciences et Techniques, Université Cheikh Anta Diop, BP 5005 Dakar, Sénégal

<sup>c</sup>Department of Anthropology, University of Florida, Gainesville, FL 32603, USA

\* Corresponding author; email: [slindshi@purdue.edu](mailto:slindshi@purdue.edu)

**Supplementary material**

**Table S1.** All data supporting the findings of this study.

This study accrued 2,092 camera trap (CT) days between 2015 and 2018. Sampling approached uniformity among seasons (wet season  $N = 718$  or 34%, early dry season  $N = 712$  or 34%, late dry season  $N = 662$  or 32%) but CT days were not uniform across months (supplementary fig. S1).

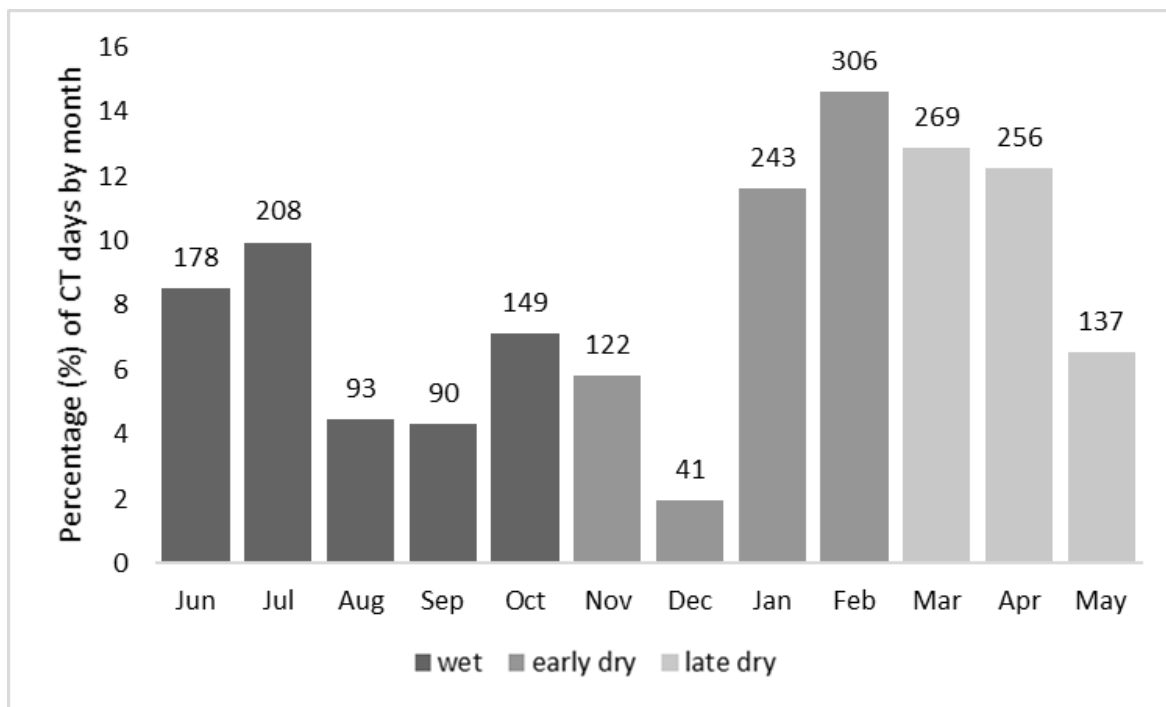

**Figure S1.** Distribution of CT days by month (all years combined) and season. The number of monthly CT days is reported above each bar.

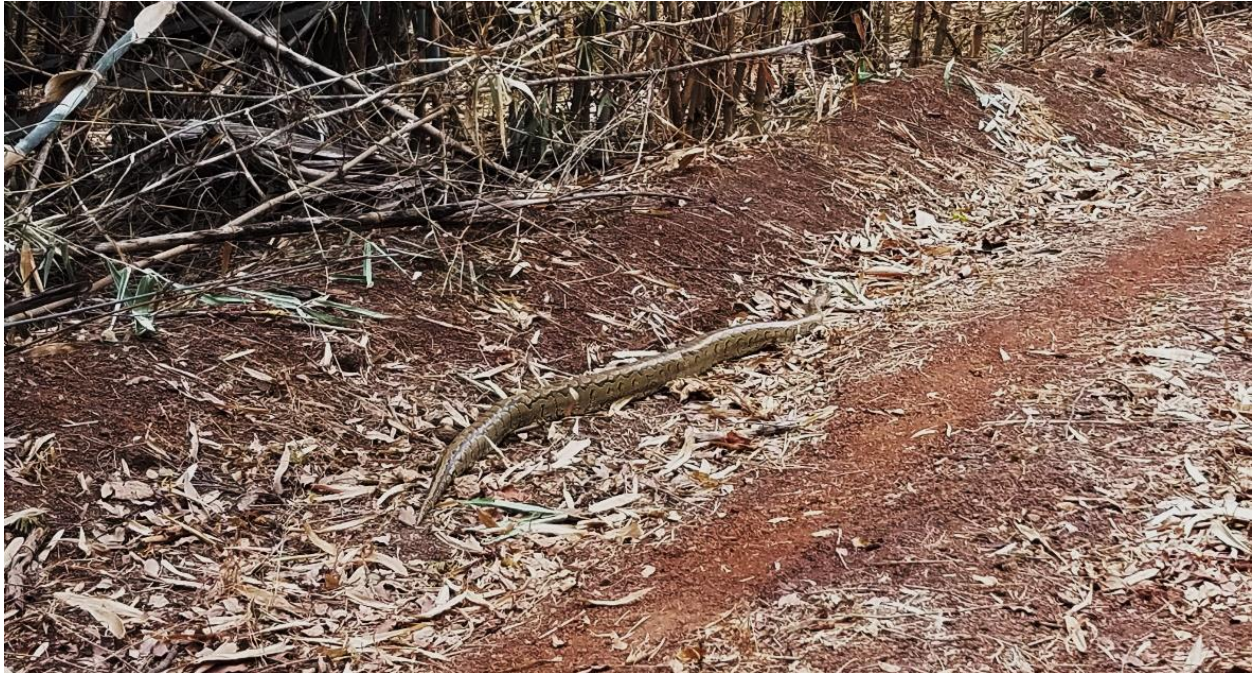

Figure S2. Rock python (*Python sebae*) photographed on an access road to Assirik in January 2018. Photo credit: Recherche Chimpanzé Assirik and Direction des Parcs Nationaux du Sénégal.

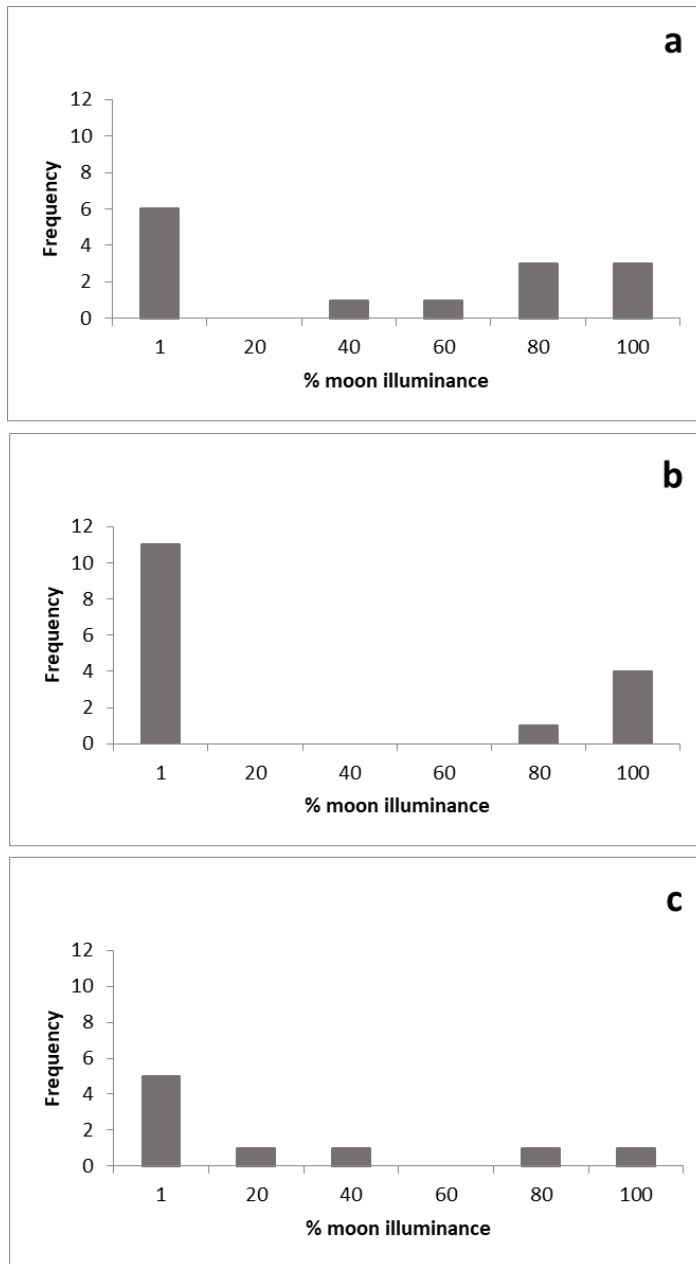

**Figure S3.** Frequency distribution of moon illuminance during nocturnal events for (a) chimpanzees, (b) leopards, and (c) spotted hyenas.
